# Supplementary material
Source: PubMed Central journal article supplement (PMC7643767)
Supplement: supp_table1.pdf [file supp_table1.pdf]

## Supplementary Data

SUPPLEMENTARY TABLE S1. LIST OF CRIMEAN–CONGO HEMORRHAGIC FEVER VIRUS STRAINS INCLUDED IN PHYLOGENETIC ANALYSES

| <i>Strain</i>         | <i>Country</i>           | <i>Source</i>                | <i>Year</i> | <i>S Acc no.</i> | <i>M Acc no.</i> | <i>L Acc no.</i> |
|-----------------------|--------------------------|------------------------------|-------------|------------------|------------------|------------------|
| 7803                  | China                    | <i>Homo sapiens</i>          | 1978        | AF354296         | AB069672         |                  |
| 75024                 | China                    | <i>H. sapiens</i>            | 1975        | AF362080         | AB069671         |                  |
| 7001                  | China                    | <i>H. sapiens</i>            | 1970        | AF415236         | AB069670         |                  |
| 9553/2001/Kosovo      | Yugoslavia               | <i>H. sapiens</i>            | 2001        | AF428144         | AY675511         |                  |
| Uzbek/TI10145         | Uzbekistan               | <i>Hyalomma asiaticum</i>    | 1985        | AF481799         |                  |                  |
| STV/HU29223           | Russia                   | <i>H. sapiens</i>            | 2000        | AF481802         |                  |                  |
| Matin                 | Pakistan                 | <i>H. sapiens</i>            | 1976        | AF527810         | AF467769         | AY422208         |
| 66019                 | China                    | <i>H. sapiens</i>            | 1966        | AJ010648         | AB069669         |                  |
| 8402                  | China                    | <i>H. asiaticum</i>          | 1984        | AJ010649         | AB069674         |                  |
| Baghdad 12            | Iraq                     | <i>H. sapiens</i>            | 1979        | AJ538196         | AJ538197         | AY947890         |
| SR3                   | Pakistan                 | <i>H. sapiens</i>            | 2000        | AJ538198         | AJ538199         |                  |
| 88166                 | China                    | <i>H. sapiens</i>            | 1988        | AY029157         | AB069675         |                  |
| TAJ/HU8966            | Tajikistan               | <i>H. sapiens</i>            | 1990        | AY049083         | AY179962         | AY720893         |
| Hodzha                | Uzbekistan               | <i>H. sapiens</i>            | 1967        | AY223475         | AY223476         | KX013447         |
| ROS/TI28044           | Russia                   | <i>Hyalomma marginatum</i>   | 2000        | AY277672         |                  |                  |
| Bul/HU517             | Bulgaria                 | <i>H. sapiens</i>            | 1978        | AY277676         |                  |                  |
| TAJ/HU8978            | Tajikistan               | <i>H. sapiens</i>            | 1991        | AY297691         |                  |                  |
| TAJ/HU8975            | Tajikistan               | <i>H. sapiens</i>            | 1990        | AY297692         |                  |                  |
| Semunya               | Uganda                   | <i>H. sapiens</i>            | 1958        | DQ076413         | DQ094832         | DQ076412         |
| SPU128/81/7           | Uganda                   | <i>Hyalomma</i> spp.         | 1981        | DQ076415         | DQ157174         | DQ076414         |
| SPU4/81               | South Africa             | <i>H. sapiens</i>            | 1981        | DQ076416         | DQ157175         | DQ076417         |
| Kosovo Hoti           | Yugoslavia               | <i>H. sapiens</i>            | 2001        | DQ133507         | EU037902         | EU044832         |
| ROS/HUVLV-100         | Russia                   | <i>H. sapiens</i>            | 2002        | DQ206447         | DQ206448         | AY995166         |
| AP92                  | Greece                   | <i>Rhipicephalus bursa</i>   | 1975        | DQ211638         | DQ211625         | DQ211612         |
| ArD8194               | Senegal                  | <i>Hyalomma truncatum</i>    | 1969        | DQ211639         | DQ211626         | DQ211613         |
| ArD15786              | Senegal                  | Goat                         | 1972        | DQ211640         | DQ211627         | DQ211614         |
| ArD39554              | Mauritania               | <i>H. marginatum rufipes</i> | 1984        | DQ211641         | DQ211628         | DQ211615         |
| C-68031               | China                    | sheep                        | 1968        | DQ211642         | DQ211629         | DQ211616         |
| Drosdov               | Russia                   | <i>H. sapiens</i>            | 1967        | DQ211643         | DQ211630         | DQ211617         |
| Kashmanov             |                          | <i>H. sapiens</i>            | 1967        | DQ211644         | DQ211631         | DQ211618         |
| Oman                  | Oman                     | <i>H. sapiens</i>            | 1997        | DQ211645         | DQ211632         | DQ211619         |
| SPU97/85              | South Africa             | <i>H. sapiens</i>            | 1985        | DQ211646         | DQ211633         | DQ211620         |
| SPU103/87             | South Africa             | <i>H. sapiens</i>            | 1987        | DQ211647         | DQ211634         | DQ211621         |
| SPU415/85             | South Africa             | <i>H. sapiens</i>            | 1985        | DQ211648         | DQ211635         | DQ211622         |
| Turkey200310849       | Turkey                   | <i>H. sapiens</i>            | 2003        | DQ211649         | DQ211636         | DQ211623         |
| Congo UG3010          | DRC                      | <i>H. sapiens</i>            | 1956        | DQ211650         | DQ211637         | DQ211624         |
| CYL/TI05035           | China                    | Tick                         | 2005        | DQ217602         |                  |                  |
| CYT/TI05099           | China                    | Tick                         | 2009        | DQ227495         |                  |                  |
| CLT/TI05146           | China                    | Tick                         | 2005        | DQ227496         |                  |                  |
| Iran-52               | Iran                     |                              | 2002        | DQ446212         | DQ446215         |                  |
| Iran-53               | Iran                     |                              | 2002        | DQ446213         | DQ446216         |                  |
| Iran-56               | Iran                     |                              | 2004        | DQ446214         |                  |                  |
| BT958                 | Central African Republic | Tick                         | 1975        | EF123122         |                  |                  |
| 66/08-Rodopi          | Greece                   | <i>H. sapiens</i>            | 2008        | EU871766         |                  |                  |
| YL04057               | China                    | Tick                         | 2004        | FJ562093         | FJ562094         | FJ562095         |
| Turkey-Kelkit06       | Turkey                   | <i>H. sapiens</i>            | 2006        | GQ337053         | GQ337054         | GQ337055         |
| Sudan Al-Fulah 3-2008 | Sudan                    | <i>H. sapiens</i>            | 2008        | GQ862371         | HQ378184         | HQ378180         |
| Sudan Al-Fulah 4-2008 | Sudan                    | <i>H. sapiens</i>            | 2008        | GQ862372         |                  | HQ378181         |
| V42/81                | Bulgaria                 | <i>H. sapiens</i>            | 1981        | GU477489         | GU477490         |                  |
| 79121 M18 (79121)     | China                    | Long-eared jerboa            | 1979        | GU477494         | GU477493         | GU477492         |

(Continued)

SUPPLEMENTARY TABLE S1. (CONTINUED)

| <i>Strain</i>               | <i>Country</i>       | <i>Source</i>              | <i>Year</i> | <i>S Acc no.</i> | <i>M Acc no.</i> | <i>L Acc no.</i> |
|-----------------------------|----------------------|----------------------------|-------------|------------------|------------------|------------------|
| Afg09-2990                  | Afghanistan          | <i>H. sapiens</i>          | 2009        | HM452305         | HM452306         | HM452307         |
| Sudan AB1-2009              | Sudan                | <i>H. sapiens</i>          | 2009        | HQ378179         | HQ378187         | HQ378183         |
| NIV 11703                   | India                | <i>H. sapiens</i>          | 2011        | JF922674         | JN572086         | JN627865         |
| NIV 1040532                 | India                | <i>H. sapiens</i>          | 2010        | JF922679         |                  |                  |
| NIV 10405051                | India                | <i>H. sapiens</i>          | 2010        | JF922681         |                  |                  |
| TAJUK #7                    | Tajikistan           | <i>H. sapiens</i>          | 2010        | JN086996         |                  |                  |
| Dubai 616                   | United Arab Emirates |                            | 1979        | JN108025         |                  |                  |
| Kosova 1917                 | Yugoslavia           | <i>H. sapiens</i>          | 2009        | JN173797         |                  |                  |
| NIVA 118594                 | India                | <i>Hyalomma anatolicum</i> | 2011        | JN572087         | JN572084         | JN572092         |
| NIVA 118595                 | India                | <i>H. anatolicum</i>       | 2011        | JN572088         | JN572083         | JN572090         |
| NIV 112143                  | India                | <i>H. sapiens</i>          | 2011        | JN572089         | JN572085         | JN572091         |
| SCT ex Afghanistan          | Afghanistan          | <i>H. sapiens</i>          | 2012        | JX908640         | KC344856         | KC344855         |
| Zahedan 2007                | Iran                 | <i>H. sapiens</i>          | 2007        | KC867274         | KC867273         | KC867272         |
| SPU 92/01                   | South Africa         | <i>H. sapiens</i>          | 2001        | KC880335         |                  |                  |
| Daral 2012                  | Mali                 | <i>Hyalomma</i> spp.       | 2012        | KF793333         |                  |                  |
| Iran-Gilan69                | Iran                 | <i>H. sapiens</i>          | 2012        | KJ027521         |                  |                  |
| Iran-Isfahan78              | Iran                 | <i>H. sapiens</i>          | 2013        | KJ027522         |                  |                  |
| Iran-Kerman43               | Iran                 | <i>H. sapiens</i>          | 2013        | KJ196326         |                  |                  |
| Iran-Tehran65               | Iran                 | <i>H. sapiens</i>          | 2011        | KJ566219         |                  |                  |
| Iran-Zahedan19              | Iran                 | <i>H. sapiens</i>          | 2012        | KJ676542         |                  |                  |
| SPU 431/85                  | South Africa         | <i>H. sapiens</i>          | 1985        | KJ682815         | KJ682812         | KJ682799         |
| SPU 383/87                  | South Africa         | <i>H. sapiens</i>          | 1987        | KJ682816         | KJ682806         | KJ682801         |
| SPU 556/87                  | South Africa         | <i>H. sapiens</i>          | 1987        | KJ682817         | KJ682811         | KJ682798         |
| SPU 18/88                   | South Africa         | <i>H. sapiens</i>          | 1988        | KJ682818         | KJ682810         | KJ682803         |
| SPU 45/88                   | South Africa         | <i>H. sapiens</i>          | 1988        | KJ682819         | KJ682809         | KJ682796         |
| SPU 497/88                  | Namibia              | <i>H. sapiens</i>          | 1988        | KJ682820         | KJ682808         | KJ682804         |
| SPU 130/89                  | South Africa         | <i>H. sapiens</i>          | 1989        | KJ682821         | KJ682807         | KJ682802         |
| SPU 48/90                   | South Africa         | <i>H. sapiens</i>          | 1990        | KJ682822         | KJ682813         | KJ682797         |
| SPU 187/90                  | South Africa         | <i>H. sapiens</i>          | 1990        | KJ682823         | KJ682814         | KJ682795         |
| SPU 44/08                   | South Africa         | <i>H. sapiens</i>          | 2008        | KJ682824         | KJ682805         | KJ682800         |
| UK ex Bulgaria              | Bulgaria             | <i>H. sapiens</i>          | 2014        | KM201260         |                  |                  |
| Surendranagar (NIV 1312358) | India                | <i>H. sapiens</i>          | 2013        | KT384398         |                  |                  |
| NIV151149                   | India                | <i>H. sapiens</i>          | 2015        | KT384401         |                  |                  |
| 1-CR/HU-2015                | Russia               | <i>H. sapiens</i>          | 2015        | KU161586         | KU161584         | KU161582         |
| 1231-CR/TI-2015             | Russia               | Tick                       | 2015        | KU161587         | KU161585         | KU161583         |
| Gaib 106                    | Tajikistan           | <i>H. sapiens</i>          | 1969        | KX013446         | KX013445         | KX013444         |
| IbAn7620                    | Nigeria              | Goat                       | 1965        | KX013452         | KX013451         | KX013450         |
| K128_76-124                 | Kazakhstan           | Tick                       | 1971        | KX013455         | KX013454         | KX013453         |
| K168_40                     | Turkmenistan         | Tick                       | 1973        | KX013458         | KX013457         | KX013456         |
| K168_125-88                 | Turkmenistan         | Tick                       | 1973        | KX013461         | KX013460         | KX013459         |
| K229_194                    | Russia               | Tick                       | 1989        | KX013464         | KX013463         | KX013462         |
| K229_243                    | Russia               | Tick                       | 1984        | KX013467         | KX013466         | KX013465         |
| K315_14                     | Russia               | Tick                       | 2000        | KX013470         | KX013469         | KX013468         |
| K323_27                     | Russia               | Tick                       | 2000        | KX013473         | KX013472         | KX013471         |
| K340_6                      | Russia               | Tick                       | 2000        | KX013476         | KX013475         | KX013474         |
| Mamon 43 Rostov             | Russia               | <i>H. sapiens</i>          | 1968        | KX013479         | KX013478         | KX013477         |
| Min 37 Rostov               | Russia               | <i>H. sapiens</i>          | 1968        | KX013482         | KX013481         | KX013480         |
| Nakiwogo 67                 | Uganda               | <i>H. sapiens</i>          | 1958        | KX013485         | KX013484         | KX013483         |
| Saf 26 Rostov               | Russia               | <i>H. sapiens</i>          | 1968        | KX013488         | KX013487         | KX013486         |
| SK 2015/human               | Kazakhstan           | <i>H. sapiens</i>          | 2015        | KX129738         |                  |                  |
| Borno                       | Nigeria              | <i>H. sapiens</i>          | 2012        | KX238958         | KX238957         | KX238956         |
| IbAr10200                   | Nigeria              | <i>Hyalomma excavatum</i>  | 1966        | NC_005302        | AF467768         | NC_005301        |
| HY 13 (HY-68013)            | China                | <i>H. asiaticum</i>        | 1968        | U88413           | AY900145         |                  |
| JD 206                      | Pakistan             | <i>H. anatolicum</i>       | 1965        | U88414           |                  |                  |
